# Supplementary material
Source: publisher figshare collection journal article supplement (https://geolsoc.figshare.com/ndownloader/files/5426927)
Supplement: Supplementary file 1 [file 5426927]

ROCK COMPOSITIONS CALCULATED USING OBSERVED MODES AND VOGT & FLOWER (1989) MINERAL ANALYSES
		Density	2.56	2.65	2.65	3.4	3.3	3.1	5.2	2.65	3.45
			Kspar	Plag	Quartz	Cpx	Hornblende	Biotite	Magnetite	Chlorite	Epidote
Rock Type	Sample
			J6153	J6216		J6048	J6153	J6153	J6048	Ward	J6326		No density correction	Density correction	OBSERVED
			Kspar	Plag	Quartz	Cpx	Hornblende	Biotite	Magnetite	Chlorite	Epidote		Calculated	Calculated	J6047
		SiO2	64.17	57.93	100.00	51.83	43.15	36.70	0.53	30.74	38.07		80.3	78.8	76.70	SiO2		211.9
		TiO2	0.00	0.00	0.00	0.14	1.85	4.91	0.00	0.47	0.40		0.2	0.2	0.34	TiO2		0.5
		Al2O3	18.18	26.79	0.00	0.98	9.21	13.19	0.00	23.02	22.90		9.6	9.3	13.40	Al2O3		25.1
		FeO	0.00	0.14	0.00	11.16	21.73	26.77	98.92	35.47	13.60		2.2	3.3	0.94	FeO*		9.0
		MgO	0.00	0.00	0.00	12.26	8.94	7.81	0.16	8.47	0.17		0.4	0.5	0.13	MgO		1.4
		MnO	0.00	0.00	0.00	0.62	0.50	0.37	0.00	0.83	0.00		0.0	0.0	0.01	MnO		0.1
		CaO	0.26	9.37	0.00	22.57	11.43	0.18	0.00	0.12	24.82		1.4	1.4	0.72	CaO		3.9
		Na2O	1.39	5.44	0.00	0.34	1.87	0.17	0.00	0.36	0.00		1.1	1.1	2.64	Na2O		2.9
		K2O	15.00	0.33	0.00	0.00	1.32	9.85	0.00	0.51	0.00		5.5	5.3	5.12	K2O		14.3
			99.00	100.00	100.00	99.90	100.00	99.95	99.61	100.00	99.96		100.6	100.0				269.0
	Mode %
AP	J6047	101	35	10	50		3	2	1
			J6153	J6216		J6048	J6153	J6153	J6048	Ward	J6326		No density correction	Density correction	OBSERVED
			Kspar	Plag	Quartz	Cpx	Hornblende	Biotite	Magnetite	Chlorite	Epidote		Calculated	Calculated	J6328
		SiO2	64.17	57.93	100.00	51.83	43.15	36.70	0.53	30.74	38.07		53.3	52.5	64.30	SiO2		146.4
		TiO2	0.00	0.00	0.00	0.14	1.85	4.91	0.00	0.47	0.40		1.2	1.4	0.70	TiO2		3.8
		Al2O3	18.18	26.79	0.00	0.98	9.21	13.19	0.00	23.02	22.90		17.8	17.5	15.70	Al2O3		48.6
		FeO	0.00	0.14	0.00	11.16	21.73	26.77	98.92	35.47	13.60		12.9	13.6	5.99	FeO*		38.0
		MgO	0.00	0.00	0.00	12.26	8.94	7.81	0.16	8.47	0.17		3.7	4.0	3.33	MgO		11.2
		MnO	0.00	0.00	0.00	0.62	0.50	0.37	0.00	0.83	0.00		0.2	0.3	0.12	MnO		0.7
		CaO	0.26	9.37	0.00	22.57	11.43	0.18	0.00	0.12	24.82		4.0	4.1	5.91	CaO		11.5
		Na2O	1.39	5.44	0.00	0.34	1.87	0.17	0.00	0.36	0.00		2.1	2.1	2.45	Na2O		5.7
		K2O	15.00	0.33	0.00	0.00	1.32	9.85	0.00	0.51	0.00		4.5	4.6	1.92	K2O		12.8
			99.00	100.00	100.00	99.90	100.00	99.95	99.61	100.00	99.96		99.8	100.0				278.7
	Mode %
BQM	J6328	100	15	30	10		10	20		15
			J6153	J6216		J6048	J6153	J6153	J6048	Ward	J6326		No density correction	Density correction	OBSERVED
			Kspar	Plag	Quartz	Cpx	Hornblende	Biotite	Magnetite	Chlorite	Epidote		Calculated	Calculated	J6332
		SiO2	64.17	57.93	100.00	51.83	43.15	36.70	0.53	30.74	38.07		54.3	52.5	62.80	SiO2		149.5
		TiO2	0.00	0.00	0.00	0.14	1.85	4.91	0.00	0.47	0.40		1.2	1.3	0.73	TiO2		3.8
		Al2O3	18.18	26.79	0.00	0.98	9.21	13.19	0.00	23.02	22.90		18.4	17.7	16.30	Al2O3		50.4
		FeO	0.00	0.14	0.00	11.16	21.73	26.77	98.92	35.47	13.60		12.1	13.5	6.24	FeO*		38.5
		MgO	0.00	0.00	0.00	12.26	8.94	7.81	0.16	8.47	0.17		3.3	3.5	3.47	MgO		10.0
		MnO	0.00	0.00	0.00	0.62	0.50	0.37	0.00	0.83	0.00		0.2	0.2	0.13	MnO		0.6
		CaO	0.26	9.37	0.00	22.57	11.43	0.18	0.00	0.12	24.82		5.0	4.9	5.66	CaO		13.9
		Na2O	1.39	5.44	0.00	0.34	1.87	0.17	0.00	0.36	0.00		2.6	2.4	2.47	Na2O		6.9
		K2O	15.00	0.33	0.00	0.00	1.32	9.85	0.00	0.51	0.00		3.8	3.8	1.91	K2O		10.9
			99.00	100.00	100.00	99.90	100.00	99.95	99.61	100.00	99.96		100.9	100.0				284.5
	Mode %
BQM	J6332	101	10	40	10		10	20	1	10
			J6153	J6216		J6048	J6153	J6153	J6048	Ward	J6326		No density correction	Density correction	OBSERVED
			Kspar	Plag	Quartz	Cpx	Hornblende	Biotite	Magnetite	Chlorite	Epidote		Calculated	Calculated	J6335
		SiO2	64.17	57.93	100.00	51.83	43.15	36.70	0.53	30.74	38.07		57.3	56.4	61.80	SiO2		157.2
		TiO2	0.00	0.00	0.00	0.14	1.85	4.91	0.00	0.47	0.40		1.2	1.3	0.71	TiO2		3.7
		Al2O3	18.18	26.79	0.00	0.98	9.21	13.19	0.00	23.02	22.90		18.3	18.0	17.00	Al2O3		50.1
		FeO	0.00	0.14	0.00	11.16	21.73	26.77	98.92	35.47	13.60		7.6	8.6	6.15	FeO*		23.9
		MgO	0.00	0.00	0.00	12.26	8.94	7.81	0.16	8.47	0.17		2.5	2.8	3.45	MgO		7.8
		MnO	0.00	0.00	0.00	0.62	0.50	0.37	0.00	0.83	0.00		0.1	0.1	0.12	MnO		0.4
		CaO	0.26	9.37	0.00	22.57	11.43	0.18	0.00	0.12	24.82		5.4	5.4	5.61	CaO		15.2
		Na2O	1.39	5.44	0.00	0.34	1.87	0.17	0.00	0.36	0.00		2.9	2.8	2.45	Na2O		7.7
		K2O	15.00	0.33	0.00	0.00	1.32	9.85	0.00	0.51	0.00		4.5	4.6	2.53	K2O		12.7
			99.00	100.00	100.00	99.90	100.00	99.95	99.61	100.00	99.96		99.8	100.0				278.7
	Mode %
BQM	J6335	100	15	45	10		10	20
			J6153	J6216		J6048	J6153	J6153	J6048	Ward	J6326		No density correction	Density correction	OBSERVED
			Kspar	Plag	Quartz	Cpx	Hornblende	Biotite	Magnetite	Chlorite	Epidote		Calculated	Calculated	J6216
		SiO2	64.17	57.93	100.00	51.83	43.15	36.70	0.53	30.74	38.07		49.4	53.7	59.70	SiO2		137.3
		TiO2	0.00	0.00	0.00	0.14	1.85	4.91	0.00	0.47	0.40		0.6	0.8	0.68	TiO2		2.0
		Al2O3	18.18	26.79	0.00	0.98	9.21	13.19	0.00	23.02	22.90		12.9	13.8	16.20	Al2O3		35.3
		FeO	0.00	0.14	0.00	11.16	21.73	26.77	98.92	35.47	13.60		10.0	15.8	6.41	FeO*		40.3
		MgO	0.00	0.00	0.00	12.26	8.94	7.81	0.16	8.47	0.17		2.6	3.3	3.37	MgO		8.4
		MnO	0.00	0.00	0.00	0.62	0.50	0.37	0.00	0.83	0.00		0.1	0.2	0.15	MnO		0.5
		CaO	0.26	9.37	0.00	22.57	11.43	0.18	0.00	0.12	24.82		5.4	6.3	5.65	CaO		16.2
		Na2O	1.39	5.44	0.00	0.34	1.87	0.17	0.00	0.36	0.00		2.0	2.2	2.38	Na2O		5.6
		K2O	15.00	0.33	0.00	0.00	1.32	9.85	0.00	0.51	0.00		3.8	4.0	5.14	K2O		10.3
			99.00	100.00	100.00	99.90	100.00	99.95	99.61	100.00	99.96		86.8	100.0				255.8
	Mode %
HBQM	J6216	87	20	25	10	3	20	5	4
			J6153	J6216		J6048	J6153	J6153	J6048	Ward	J6326		No density correction	Density correction	OBSERVED
			Kspar	Plag	Quartz	Cpx	Hornblende	Biotite	Magnetite	Chlorite	Epidote		Calculated	Calculated	J6323
		SiO2	64.17	57.93	100.00	51.83	43.15	36.70	0.53	30.74	38.07		53.3	51.8	60.80	SiO2		150.8
		TiO2	0.00	0.00	0.00	0.14	1.85	4.91	0.00	0.47	0.40		1.2	1.4	0.78	TiO2		4.0
		Al2O3	18.18	26.79	0.00	0.98	9.21	13.19	0.00	23.02	22.90		16.3	15.6	16.00	Al2O3		45.4
		FeO	0.00	0.14	0.00	11.16	21.73	26.77	98.92	35.47	13.60		11.3	13.2	6.56	FeO*		38.4
		MgO	0.00	0.00	0.00	12.26	8.94	7.81	0.16	8.47	0.17		3.8	4.2	3.65	MgO		12.2
		MnO	0.00	0.00	0.00	0.62	0.50	0.37	0.00	0.83	0.00		0.2	0.2	0.13	MnO		0.7
		CaO	0.26	9.37	0.00	22.57	11.43	0.18	0.00	0.12	24.82		6.3	6.5	6.12	CaO		19.0
		Na2O	1.39	5.44	0.00	0.34	1.87	0.17	0.00	0.36	0.00		2.5	2.4	2.40	Na2O		7.0
		K2O	15.00	0.33	0.00	0.00	1.32	9.85	0.00	0.51	0.00		4.9	4.6	3.24	K2O		13.5
			99.00	100.00	100.00	99.90	100.00	99.95	99.61	100.00	99.96		99.8	100.0				291.0
	Mode %
HBQM	J6323	100	20	30	5		30	14	1
			J6153	J6216		J6048	J6153	J6153	J6048	Ward	J6326		No density correction	Density correction	OBSERVED
			Kspar	Plag	Quartz	Cpx	Hornblende	Biotite	Magnetite	Chlorite	Epidote		Calculated	Calculated	J6317
		SiO2	64.17	57.93	100.00	51.83	43.15	36.70	0.53	30.74	38.07		54.4	53.4	64.80	SiO2		151.6
		TiO2	0.00	0.00	0.00	0.14	1.85	4.91	0.00	0.47	0.40		1.4	1.5	0.73	TiO2		4.3
		Al2O3	18.18	26.79	0.00	0.98	9.21	13.19	0.00	23.02	22.90		17.1	16.6	14.70	Al2O3		47.2
		FeO	0.00	0.14	0.00	11.16	21.73	26.77	98.92	35.47	13.60		9.7	10.9	5.88	FeO*		31.1
		MgO	0.00	0.00	0.00	12.26	8.94	7.81	0.16	8.47	0.17		3.4	3.8	3.22	MgO		10.7
		MnO	0.00	0.00	0.00	0.62	0.50	0.37	0.00	0.83	0.00		0.2	0.2	0.11	MnO		0.6
		CaO	0.26	9.37	0.00	22.57	11.43	0.18	0.00	0.12	24.82		5.2	5.4	4.01	CaO		15.3
		Na2O	1.39	5.44	0.00	0.34	1.87	0.17	0.00	0.36	0.00		2.4	2.3	2.15	Na2O		6.6
		K2O	15.00	0.33	0.00	0.00	1.32	9.85	0.00	0.51	0.00		6.1	5.9	4.15	K2O		16.8
			99.00	100.00	100.00	99.90	100.00	99.95	99.61	100.00	99.96		99.7	100.0				284.1
	Mode %
HBQMP	J6317	100	25	30	5		20	20
			J6153	J6216		J6048	J6153	J6153	J6048	Ward	J6326		No density correction	Density correction	OBSERVED
			Kspar	Plag	Quartz	Cpx	Hornblende	Biotite	Magnetite	Chlorite	Epidote		Calculated	Calculated	J6152
		SiO2	64.17	57.93	100.00	51.83	43.15	36.70	0.53	30.74	38.07		56.2	53.1	66.10	SiO2		154.0
		TiO2	0.00	0.00	0.00	0.14	1.85	4.91	0.00	0.47	0.40		0.7	0.7	0.37	TiO2		2.1
		Al2O3	18.18	26.79	0.00	0.98	9.21	13.19	0.00	23.02	22.90		14.7	13.8	15.00	Al2O3		40.1
		FeO	0.00	0.14	0.00	11.16	21.73	26.77	98.92	35.47	13.60		14.2	18.5	5.07	FeO*		53.7
		MgO	0.00	0.00	0.00	12.26	8.94	7.81	0.16	8.47	0.17		3.0	3.2	1.46	MgO		9.4
		MnO	0.00	0.00	0.00	0.62	0.50	0.37	0.00	0.83	0.00		0.2	0.2	0.08	MnO		0.6
		CaO	0.26	9.37	0.00	22.57	11.43	0.18	0.00	0.12	24.82		4.2	4.4	3.89	CaO		12.7
		Na2O	1.39	5.44	0.00	0.34	1.87	0.17	0.00	0.36	0.00		1.9	1.8	2.40	Na2O		5.1
		K2O	15.00	0.33	0.00	0.00	1.32	9.85	0.00	0.51	0.00		4.6	4.2	5.48	K2O		12.3
			99.00	100.00	100.00	99.90	100.00	99.95	99.61	100.00	99.96		99.7	100.0				290.0
	Mode %
HQM	J6152	100	25	20	15		20	5	5	10
			J6153	J6216		J6048	J6153	J6153	J6048	Ward	J6326		No density correction	Density correction	OBSERVED
			Kspar	Plag	Quartz	Cpx	Hornblende	Biotite	Magnetite	Chlorite	Epidote		Calculated	Calculated	J6154
		SiO2	64.17	57.93	100.00	51.83	43.15	36.70	0.53	30.74	38.07		57.5	55.5	63.20	SiO2		161.1
		TiO2	0.00	0.00	0.00	0.14	1.85	4.91	0.00	0.47	0.40		0.8	0.9	0.56	TiO2		2.6
		Al2O3	18.18	26.79	0.00	0.98	9.21	13.19	0.00	23.02	22.90		14.0	13.4	15.00	Al2O3		38.9
		FeO	0.00	0.14	0.00	11.16	21.73	26.77	98.92	35.47	13.60		10.8	14.0	5.75	FeO*		40.8
		MgO	0.00	0.00	0.00	12.26	8.94	7.81	0.16	8.47	0.17		3.3	3.7	2.84	MgO		10.8
		MnO	0.00	0.00	0.00	0.62	0.50	0.37	0.00	0.83	0.00		0.2	0.2	0.13	MnO		0.6
		CaO	0.26	9.37	0.00	22.57	11.43	0.18	0.00	0.12	24.82		6.6	6.9	5.07	CaO		20.1
		Na2O	1.39	5.44	0.00	0.34	1.87	0.17	0.00	0.36	0.00		2.3	2.2	2.64	Na2O		6.5
		K2O	15.00	0.33	0.00	0.00	1.32	9.85	0.00	0.51	0.00		3.4	3.2	4.51	K2O		9.2
			99.00	100.00	100.00	99.90	100.00	99.95	99.61	100.00	99.96		98.8	100.0				290.6
	Mode %
HQM	J6154	99	15	30	15	4	25	7	3
			J6153	J6216		J6048	J6153	J6153	J6048	Ward	J6326		No density correction	Density correction	OBSERVED
			Kspar	Plag	Quartz	Cpx	Hornblende	Biotite	Magnetite	Chlorite	Epidote		Calculated	Calculated	J6176
		SiO2	64.17	57.93	100.00	51.83	43.15	36.70	0.53	30.74	38.07		57.3	55.3	63.50	SiO2		160.4
		TiO2	0.00	0.00	0.00	0.14	1.85	4.91	0.00	0.47	0.40		0.7	0.7	0.46	TiO2		2.2
		Al2O3	18.18	26.79	0.00	0.98	9.21	13.19	0.00	23.02	22.90		17.4	16.5	16.00	Al2O3		47.8
		FeO	0.00	0.14	0.00	11.16	21.73	26.77	98.92	35.47	13.60		8.9	10.6	5.13	FeO*		30.7
		MgO	0.00	0.00	0.00	12.26	8.94	7.81	0.16	8.47	0.17		3.1	3.5	2.32	MgO		10.2
		MnO	0.00	0.00	0.00	0.62	0.50	0.37	0.00	0.83	0.00		0.2	0.2	0.10	MnO		0.6
		CaO	0.26	9.37	0.00	22.57	11.43	0.18	0.00	0.12	24.82		7.9	8.0	4.56	CaO		23.3
		Na2O	1.39	5.44	0.00	0.34	1.87	0.17	0.00	0.36	0.00		3.2	3.0	2.81	Na2O		8.7
		K2O	15.00	0.33	0.00	0.00	1.32	9.85	0.00	0.51	0.00		2.3	2.1	4.90	K2O		6.2
			99.00	100.00	100.00	99.90	100.00	99.95	99.61	100.00	99.96		100.9	100.0				290.2
	Mode %
HQM	J6176	101	10	45	10	1	30	2	1	2
			J6153	J6216		J6048	J6153	J6153	J6048	Ward	J6326		No density correction	Density correction	OBSERVED
			Kspar	Plag	Quartz	Cpx	Hornblende	Biotite	Magnetite	Chlorite	Epidote		Calculated	Calculated	J6179
		SiO2	64.17	57.93	100.00	51.83	43.15	36.70	0.53	30.74	38.07		61.4	59.1	63.30	SiO2		169.6
		TiO2	0.00	0.00	0.00	0.14	1.85	4.91	0.00	0.47	0.40		0.6	0.6	0.47	TiO2		1.8
		Al2O3	18.18	26.79	0.00	0.98	9.21	13.19	0.00	23.02	22.90		15.3	14.7	16.60	Al2O3		42.1
		FeO	0.00	0.14	0.00	11.16	21.73	26.77	98.92	35.47	13.60		7.6	9.3	4.79	FeO*		26.8
		MgO	0.00	0.00	0.00	12.26	8.94	7.81	0.16	8.47	0.17		2.7	3.1	2.12	MgO		8.9
		MnO	0.00	0.00	0.00	0.62	0.50	0.37	0.00	0.83	0.00		0.2	0.2	0.09	MnO		0.5
		CaO	0.26	9.37	0.00	22.57	11.43	0.18	0.00	0.12	24.82		6.3	6.6	4.64	CaO		18.9
		Na2O	1.39	5.44	0.00	0.34	1.87	0.17	0.00	0.36	0.00		2.5	2.5	2.66	Na2O		7.1
		K2O	15.00	0.33	0.00	0.00	1.32	9.85	0.00	0.51	0.00		4.2	3.9	5.15	K2O		11.2
			99.00	100.00	100.00	99.90	100.00	99.95	99.61	100.00	99.96		100.7	100.0				286.8
	Mode %
HQM	J6179	101	25	30	15		30		1
			J6153	J6216		J6048	J6153	J6153	J6048	Ward	J6326		No density correction	Density correction	OBSERVED
			Kspar	Plag	Quartz	Cpx	Hornblende	Biotite	Magnetite	Chlorite	Epidote		Calculated	Calculated	J6183
		SiO2	64.17	57.93	100.00	51.83	43.15	36.70	0.53	30.74	38.07		62.2	62.4	66.70	SiO2		170.7
		TiO2	0.00	0.00	0.00	0.14	1.85	4.91	0.00	0.47	0.40		0.7	0.8	0.48	TiO2		2.3
		Al2O3	18.18	26.79	0.00	0.98	9.21	13.19	0.00	23.02	22.90		14.0	14.0	14.30	Al2O3		38.4
		FeO	0.00	0.14	0.00	11.16	21.73	26.77	98.92	35.47	13.60		6.4	7.5	4.74	FeO*		20.6
		MgO	0.00	0.00	0.00	12.26	8.94	7.81	0.16	8.47	0.17		2.5	2.9	2.46	MgO		8.0
		MnO	0.00	0.00	0.00	0.62	0.50	0.37	0.00	0.83	0.00		0.1	0.2	0.08	MnO		0.4
		CaO	0.26	9.37	0.00	22.57	11.43	0.18	0.00	0.12	24.82		4.9	5.4	4.08	CaO		14.7
		Na2O	1.39	5.44	0.00	0.34	1.87	0.17	0.00	0.36	0.00		2.1	2.1	2.44	Na2O		5.8
		K2O	15.00	0.33	0.00	0.00	1.32	9.85	0.00	0.51	0.00		4.8	4.7	4.57	K2O		12.8
			99.00	100.00	100.00	99.90	100.00	99.95	99.61	100.00	99.96		97.7	100.0				273.7
	Mode %
HQM	J6183	98	25	25	20	1	20	7
			J6153	J6216		J6048	J6153	J6153	J6048	Ward	J6326		No density correction	Density correction	OBSERVED
			Kspar	Plag	Quartz	Cpx	Hornblende	Biotite	Magnetite	Chlorite	Epidote		Calculated	Calculated	J6214
		SiO2	64.17	57.93	100.00	51.83	43.15	36.70	0.53	30.74	38.07		57.1	58.8	64.00	SiO2		159.4
		TiO2	0.00	0.00	0.00	0.14	1.85	4.91	0.00	0.47	0.40		0.8	1.0	0.56	TiO2		2.6
		Al2O3	18.18	26.79	0.00	0.98	9.21	13.19	0.00	23.02	22.90		13.8	14.1	16.40	Al2O3		38.2
		FeO	0.00	0.14	0.00	11.16	21.73	26.77	98.92	35.47	13.60		7.9	9.5	5.72	FeO*		25.8
		MgO	0.00	0.00	0.00	12.26	8.94	7.81	0.16	8.47	0.17		3.1	3.7	3.16	MgO		10.1
		MnO	0.00	0.00	0.00	0.62	0.50	0.37	0.00	0.83	0.00		0.2	0.2	0.09	MnO		0.6
		CaO	0.26	9.37	0.00	22.57	11.43	0.18	0.00	0.12	24.82		5.8	6.5	3.28	CaO		17.7
		Na2O	1.39	5.44	0.00	0.34	1.87	0.17	0.00	0.36	0.00		2.2	2.3	2.45	Na2O		6.2
		K2O	15.00	0.33	0.00	0.00	1.32	9.85	0.00	0.51	0.00		4.0	4.0	4.14	K2O		10.7
			99.00	100.00	100.00	99.90	100.00	99.95	99.61	100.00	99.96		94.8	100.0				271.2
	Mode %
HQM	J6214	95	20	25	15		30	5
			J6153	J6216		J6048	J6153	J6153	J6048	Ward	J6326		No density correction	Density correction	OBSERVED
			Kspar	Plag	Quartz	Cpx	Hornblende	Biotite	Magnetite	Chlorite	Epidote		Calculated	Calculated	J6316
		SiO2	64.17	57.93	100.00	51.83	43.15	36.70	0.53	30.74	38.07		56.5	56.1	65.00	SiO2		156.7
		TiO2	0.00	0.00	0.00	0.14	1.85	4.91	0.00	0.47	0.40		0.8	0.9	0.59	TiO2		2.6
		Al2O3	18.18	26.79	0.00	0.98	9.21	13.19	0.00	23.02	22.90		16.2	16.0	14.50	Al2O3		44.6
		FeO	0.00	0.14	0.00	11.16	21.73	26.77	98.92	35.47	13.60		8.3	10.4	5.75	FeO*		29.0
		MgO	0.00	0.00	0.00	12.26	8.94	7.81	0.16	8.47	0.17		2.8	3.3	3.00	MgO		9.1
		MnO	0.00	0.00	0.00	0.62	0.50	0.37	0.00	0.83	0.00		0.2	0.2	0.11	MnO		0.5
		CaO	0.26	9.37	0.00	22.57	11.43	0.18	0.00	0.12	24.82		6.2	6.5	4.19	CaO		18.3
		Na2O	1.39	5.44	0.00	0.34	1.87	0.17	0.00	0.36	0.00		2.7	2.6	2.09	Na2O		7.3
		K2O	15.00	0.33	0.00	0.00	1.32	9.85	0.00	0.51	0.00		4.1	4.0	4.58	K2O		11.2
			99.00	100.00	100.00	99.90	100.00	99.95	99.61	100.00	99.96		97.8	100.0				279.3
	Mode %
HQM	J6316	98	20	35	10		25	7	1
			J6153	J6216		J6048	J6153	J6153	J6048	Ward	J6326		No density correction	Density correction	OBSERVED
			Kspar	Plag	Quartz	Cpx	Hornblende	Biotite	Magnetite	Chlorite	Epidote		Calculated	Calculated	J6217
		SiO2	64.17	57.93	100.00	51.83	43.15	36.70	0.53	30.74	38.07		57.1	54.4	54.30	SiO2		166.6
		TiO2	0.00	0.00	0.00	0.14	1.85	4.91	0.00	0.47	0.40		1.2	1.2	1.28	TiO2		3.8
		Al2O3	18.18	26.79	0.00	0.98	9.21	13.19	0.00	23.02	22.90		10.0	9.7	10.70	Al2O3		29.7
		FeO	0.00	0.14	0.00	11.16	21.73	26.77	98.92	35.47	13.60		14.7	17.1	12.28	FeO*		52.3
		MgO	0.00	0.00	0.00	12.26	8.94	7.81	0.16	8.47	0.17		5.2	5.5	6.09	MgO		17.0
		MnO	0.00	0.00	0.00	0.62	0.50	0.37	0.00	0.83	0.00		0.3	0.3	0.25	MnO		0.9
		CaO	0.26	9.37	0.00	22.57	11.43	0.18	0.00	0.12	24.82		7.3	7.6	8.01	CaO		23.3
		Na2O	1.39	5.44	0.00	0.34	1.87	0.17	0.00	0.36	0.00		1.7	1.7	0.99	Na2O		5.2
		K2O	15.00	0.33	0.00	0.00	1.32	9.85	0.00	0.51	0.00		2.6	2.4	5.52	K2O		7.2
			99.00	100.00	100.00	99.90	100.00	99.95	99.61	100.00	99.96		99.9	100.0				306.0
	Mode %
INC	J6217	100	10	10	20		55	3	2
			J6153	J6216		J6048	J6153	J6153	J6048	Ward	J6326		No density correction	Density correction	OBSERVED
			Kspar	Plag	Quartz	Cpx	Hornblende	Biotite	Magnetite	Chlorite	Epidote		Calculated	Calculated	J6315
		SiO2	64.17	57.93	100.00	51.83	43.15	36.70	0.53	30.74	38.07		60.3	59.2	59.10	SiO2		159.6
		TiO2	0.00	0.00	0.00	0.14	1.85	4.91	0.00	0.47	0.40		0.0	0.0	0.74	TiO2		0.1
		Al2O3	18.18	26.79	0.00	0.98	9.21	13.19	0.00	23.02	22.90		22.0	21.6	20.90	Al2O3		58.2
		FeO	0.00	0.14	0.00	11.16	21.73	26.77	98.92	35.47	13.60		3.3	6.1	4.49	FeO*		16.4
		MgO	0.00	0.00	0.00	12.26	8.94	7.81	0.16	8.47	0.17		0.1	0.1	0.06	MgO		0.3
		MnO	0.00	0.00	0.00	0.62	0.50	0.37	0.00	0.83	0.00		0.0	0.0	0.04	MnO		0.0
		CaO	0.26	9.37	0.00	22.57	11.43	0.18	0.00	0.12	24.82		7.2	7.1	2.64	CaO		19.1
		Na2O	1.39	5.44	0.00	0.34	1.87	0.17	0.00	0.36	0.00		4.2	4.2	7.05	Na2O		11.2
		K2O	15.00	0.33	0.00	0.00	1.32	9.85	0.00	0.51	0.00		1.8	1.7	5.05	K2O		4.5
			99.00	100.00	100.00	99.90	100.00	99.95	99.61	100.00	99.96		98.9	100.0				269.4
	Mode %
INC	J6315	99	10	75	10		1		3
			J6153	J6216		J6048	J6153	J6153	J6048	Ward	J6326		No density correction	Density correction	OBSERVED
			Kspar	Plag	Quartz	Cpx	Hornblende	Biotite	Magnetite	Chlorite	Epidote		Calculated	Calculated	J6364
		SiO2	64.17	57.93	100.00	51.83	43.15	36.70	0.53	30.74	38.07		61.9	60.9	66.60	SiO2		169.6
		TiO2	0.00	0.00	0.00	0.14	1.85	4.91	0.00	0.47	0.40		0.6	0.7	0.45	TiO2		2.0
		Al2O3	18.18	26.79	0.00	0.98	9.21	13.19	0.00	23.02	22.90		15.8	15.4	16.10	Al2O3		43.0
		FeO	0.00	0.14	0.00	11.16	21.73	26.77	98.92	35.47	13.60		7.5	8.4	4.72	FeO*		23.3
		MgO	0.00	0.00	0.00	12.26	8.94	7.81	0.16	8.47	0.17		2.6	3.0	1.48	MgO		8.2
		MnO	0.00	0.00	0.00	0.62	0.50	0.37	0.00	0.83	0.00		0.2	0.2	0.09	MnO		0.5
		CaO	0.26	9.37	0.00	22.57	11.43	0.18	0.00	0.12	24.82		5.6	5.9	3.19	CaO		16.4
		Na2O	1.39	5.44	0.00	0.34	1.87	0.17	0.00	0.36	0.00		2.5	2.5	2.31	Na2O		6.9
		K2O	15.00	0.33	0.00	0.00	1.32	9.85	0.00	0.51	0.00		3.1	3.1	4.77	K2O		8.5
			99.00	100.00	100.00	99.90	100.00	99.95	99.61	100.00	99.96		99.8	100.0				278.5
	Mode %
INC	J6364	100	15	35	20		20	5		5
			J6153	J6216		J6048	J6153	J6153	J6048	Ward	J6326		No density correction	Density correction	OBSERVED
			Kspar	Plag	Quartz	Cpx	Hornblende	Biotite	Magnetite	Chlorite	Epidote		Calculated	Calculated	J6054
		SiO2	64.17	57.93	100.00	51.83	43.15	36.70	0.53	30.74	38.07		47.9	46.8	64.50	SiO2		133.3
		TiO2	0.00	0.00	0.00	0.14	1.85	4.91	0.00	0.47	0.40		0.3	0.3	0.56	TiO2		0.8
		Al2O3	18.18	26.79	0.00	0.98	9.21	13.19	0.00	23.02	22.90		19.1	17.9	15.70	Al2O3		50.8
		FeO	0.00	0.14	0.00	11.16	21.73	26.77	98.92	35.47	13.60		14.6	18.6	5.63	FeO*		52.9
		MgO	0.00	0.00	0.00	12.26	8.94	7.81	0.16	8.47	0.17		3.8	4.0	2.74	MgO		11.5
		MnO	0.00	0.00	0.00	0.62	0.50	0.37	0.00	0.83	0.00		0.3	0.3	0.09	MnO		0.8
		CaO	0.26	9.37	0.00	22.57	11.43	0.18	0.00	0.12	24.82		8.1	8.4	4.44	CaO		24.0
		Na2O	1.39	5.44	0.00	0.34	1.87	0.17	0.00	0.36	0.00		2.9	2.7	2.37	Na2O		7.7
		K2O	15.00	0.33	0.00	0.00	1.32	9.85	0.00	0.51	0.00		1.0	1.0	3.77	K2O		2.8
			99.00	100.00	100.00	99.90	100.00	99.95	99.61	100.00	99.96		97.9	100.0				284.5
	Mode %
PQM	J6054	98	3	50	2	15		3	5	20
